# Supplementary material for: Freshness Quality and Shelf Life Evaluation of the Seaweed Ulva rigida through Physical, Chemical, Microbiological, and Sensory Methods
Source: PubMed Central journal article supplement (PMC7831315; doi:10.3390/foods10010181), 2021-01-18
Supplement: foods-10-00181-s001.pdf [file foods-10-00181-s001.pdf]

**Suppl. Table 1.** Sensory analysis sheet prepared for the organoleptic characterization of *Ulva rigida* (UR).

| Sample name:                 |                     | Intensity scale   |   |   |   |   | Observations |
|------------------------------|---------------------|-------------------|---|---|---|---|--------------|
| Descriptors                  |                     | 0                 | 1 | 2 | 3 | 4 |              |
| Appearance                   | General aspect      |                   |   |   |   |   |              |
|                              | Color intensity     |                   |   |   |   |   |              |
|                              | Brightness          |                   |   |   |   |   |              |
| Marine aromas                | Fresh fish          |                   |   |   |   |   |              |
|                              | Cooked fish         |                   |   |   |   |   |              |
|                              | Dried/salty fish    |                   |   |   |   |   |              |
|                              | Rotten fish         |                   |   |   |   |   |              |
|                              | Crustacean          |                   |   |   |   |   |              |
|                              | Mollusk             |                   |   |   |   |   |              |
|                              | Seaweed             |                   |   |   |   |   |              |
|                              | Coast/rock          |                   |   |   |   |   |              |
|                              | Sludge              |                   |   |   |   |   |              |
| Vegetable aromas             | Fresh grass         |                   |   |   |   |   |              |
|                              | Raw vegetable       |                   |   |   |   |   |              |
|                              | Cooked vegetable    |                   |   |   |   |   |              |
|                              | Rotten vegetable    |                   |   |   |   |   |              |
|                              | Fruit               |                   |   |   |   |   |              |
| Other aromas                 | Fungi/mold          |                   |   |   |   |   |              |
|                              | Spices              |                   |   |   |   |   |              |
|                              | Urine               |                   |   |   |   |   |              |
|                              | Strong, rotten odor |                   |   |   |   |   |              |
| Tactile mouthfeel and flavor | Other (define)      |                   |   |   |   |   |              |
|                              | Fishy flavor        |                   |   |   |   |   |              |
|                              | Vegetable flavor    |                   |   |   |   |   |              |
|                              | Flavor intensity    |                   |   |   |   |   |              |
|                              | Persistence         |                   |   |   |   |   |              |
| Touch                        | Chewiness           |                   |   |   |   |   |              |
|                              | Hardness            |                   |   |   |   |   |              |
|                              | Stickiness          |                   |   |   |   |   |              |
|                              | Elasticity          |                   |   |   |   |   |              |
|                              |                     | Global evaluation |   |   |   |   |              |
